# Supplementary material
Source: MDPI journal article supplement (https://www.mdpi.com/2073-4441/14/12/1933)
Supplement: s1 [file s1]

## Supplementary Material

Table S1. The final concentrations of  $\text{Mg}^{2+}$ ,  $\text{NH}_4^+$ ,  $\text{PO}_4^{3-}$ , and  $\text{Ca}^{2+}$ , pertaining to all batch tests in Table 2, along with the associated initial  $\text{NH}_4^+$  concentration values. The results are the averages of three replicate experiments  $\pm$  one standard deviation.

| Exp. No. | $\text{Mg}^{2+}:\text{NH}_4^+:\text{PO}_4^{3-}$ Molar Ratios | $\text{Mg}^{2+}$ Source      | $\text{Ca}^{2+}:\text{Mg}^{2+}$ Molar Ratio | $\text{Ca}^{2+}$ Source      | pH   | Initial $\text{NH}_4^+$ (mg/L) | Final $\text{NH}_4^+$ (mg/L) | Final $\text{PO}_4^{3-}$ (mg/L) | Final $\text{Mg}^{2+}$ (mg/L) | Final $\text{Ca}^{2+}$ (mg/L) |
|----------|--------------------------------------------------------------|------------------------------|---------------------------------------------|------------------------------|------|--------------------------------|------------------------------|---------------------------------|-------------------------------|-------------------------------|
| 1        | 1:1:1                                                        | $\text{MgCl}_2$              | 0                                           | -                            | 9.5  | 4050                           | 753.3 $\pm$ 93.4             | 4033 $\pm$ 351                  | 2.6 $\pm$ 2.2                 | 22 $\pm$ 6.9                  |
| 2        | 1.25:1:1                                                     | $\text{MgCl}_2$              | 0                                           | -                            | 9.5  | 4050                           | 320 $\pm$ 52.9               | 58.7 $\pm$ 10.1                 | 250.7 $\pm$ 75.1              | 57 $\pm$ 8.5                  |
| 3        | 1:1:1.25                                                     | $\text{MgCl}_2$              | 0                                           | -                            | 9.5  | 4050                           | 690 $\pm$ 99                 | 7600 $\pm$ 519                  | 3.9 $\pm$ 0.7                 | 31 $\pm$ 10.6                 |
| 4        | 1.25:1:1.25                                                  | $\text{MgCl}_2$              | 0                                           | -                            | 9.5  | 4050                           | 130 $\pm$ 21.8               | 2846.7 $\pm$ 223                | 6.1 $\pm$ 1.4                 | 33.4 $\pm$ 8.2                |
| 5        | 1.25:1:1.25                                                  | $\text{MgCl}_2$              | 0                                           | -                            | 8.5  | 4050                           | 93.3 $\pm$ 17.5              | 3600 $\pm$ 52.3                 | 26.3 $\pm$ 3.8                | 49.6 $\pm$ 7.8                |
| 6        | 1.25:1:1.25                                                  | $\text{MgCl}_2$              | 0                                           | -                            | 10.5 | 4250                           | 567 $\pm$ 0                  | 2833 $\pm$ 181.5                | 4.4 $\pm$ 1.7                 | 28.5 $\pm$ 1.9                |
| 7        | 1.25:1:1.25                                                  | $\text{MgCl}_2$              | 0.1                                         | $\text{CaCl}_2$              | 9.5  | 3200                           | 107 $\pm$ 59.6               | 703.3 $\pm$ 314.7               | 42.4 $\pm$ 16.7               | 205.8 $\pm$ 30.5              |
| 8        | 1.25:1:1.25                                                  | $\text{MgCl}_2$              | 0.2                                         | $\text{CaCl}_2$              | 9.5  | 3200                           | 145 $\pm$ 36.3               | 148.7 $\pm$ 39.9                | 51 $\pm$ 7.2                  | 175.3 $\pm$ 17.8              |
| 9        | 1.25:1:1.25                                                  | $\text{MgCl}_2$              | 0.5                                         | $\text{CaCl}_2$              | 9.5  | 4050                           | 290 $\pm$ 31                 | 111 $\pm$ 17.8                  | 41.2 $\pm$ 10.5               | 40.3 $\pm$ 15.9               |
| 10       | 1.25:1:1.25                                                  | $\text{MgCl}_2$              | 1                                           | $\text{CaCl}_2$              | 9.5  | 4250                           | 1214 $\pm$ 0                 | 6.3 $\pm$ 2.73                  | 321.5 $\pm$ 25.6              | 35.5 $\pm$ 13.2               |
| 11       | 1.25:1:1.25                                                  | $\text{CaMg}(\text{CO}_3)_2$ | 1                                           | $\text{CaMg}(\text{CO}_3)_2$ | 9.5  | 3744                           | 3263 $\pm$ 313.1             | 23475 $\pm$ 1900                | 1.8 $\pm$ 0.2                 | 61.3 $\pm$ 4.1                |
| 12       | 1.25:1:1.25                                                  | $\text{MgO}$                 | 1                                           | $\text{CaCO}_3$              | 9.5  | 3744                           | 2351.4 $\pm$ 156             | 8409.6 $\pm$ 280                | 36 $\pm$ 0                    | 0                             |
| 13       | 1.25:1:1.25                                                  | $\text{MgO}$                 | 1                                           | $\text{CaO}$                 | 9.5  | 3744                           | 1720.3 $\pm$ 175.5           | 10633.3 $\pm$ 152               | 0.2 $\pm$ 0.06                | 38.3 $\pm$ 7.2                |

## Calcination of dolomite

Raw dolomite was subjected to two calcination procedures to increase magnesium activity: CO<sub>2</sub>-calcination and air-calcination.

### *CO<sub>2</sub> – calcination*

Raw dolomite was placed in a muffle furnace where the temperature was ramped up to 750°C under a heating rate of 6 °C/min then held for 2 hours. The heating was conducted under a continuous carbon dioxide (CO<sub>2</sub>) flow of 100 L/hr. The dolomite was then allowed to cool to room temperature and was used as is without further treatment.

### *Air – calcination*

Raw dolomite was placed in a muffle furnace where temperature was ramped to 950°C under a heating rate of 6 °C/min then held for 2 hours under normal atmospheric conditions. The dolomite was then allowed to cool to room temperature and was used as is without further treatment.

### *XRPD characterization of calcined dolomite*

The X-Ray diffraction analysis of raw dolomite clearly detected the characteristic peaks corresponding to dolomite MgCa(CO<sub>3</sub>)<sub>2</sub> at 30.938°, 41.127° and 56.477° (PDF 00-036-0426) (Figure S1). Calcination under CO<sub>2</sub> atmosphere and 750°C resulted in the formation of periclase (MgO) and calcite (CaCO<sub>3</sub>) as evidenced by their characteristic peaks at 42.855°, 62.215° (PDF 01-071-1176) and 23.07°, 29.454°, 48.578° (PDF 00-024-0027), respectively. The obtained XRPD patterns of dolomite and CO<sub>2</sub>-calcined dolomite are consistent with those obtained by other researchers. The calcination under normal atmosphere and a temperature of 950°C is expected to result in the formation of periclase and lime (CaO). The peaks of both of these solid phases were detected by XRPD with characteristic peaks at 42.855°, 62.215° (PDF 01-071-1176) and 32.171°, 37.318°, 53.803° (PDF 01-070-5490), respectively. However, characteristic peaks corresponding to portlandite Ca(OH)<sub>2</sub> at 17.98° and 47.04° (PDF 00-001-1079), were also detected which indicates that this phase is present in the calcined sample. Portlandite is the product of lime hydration. It appears that the calcined sample absorbed moisture from the atmosphere, which led to the partial hydration of lime resulting from the calcination process.

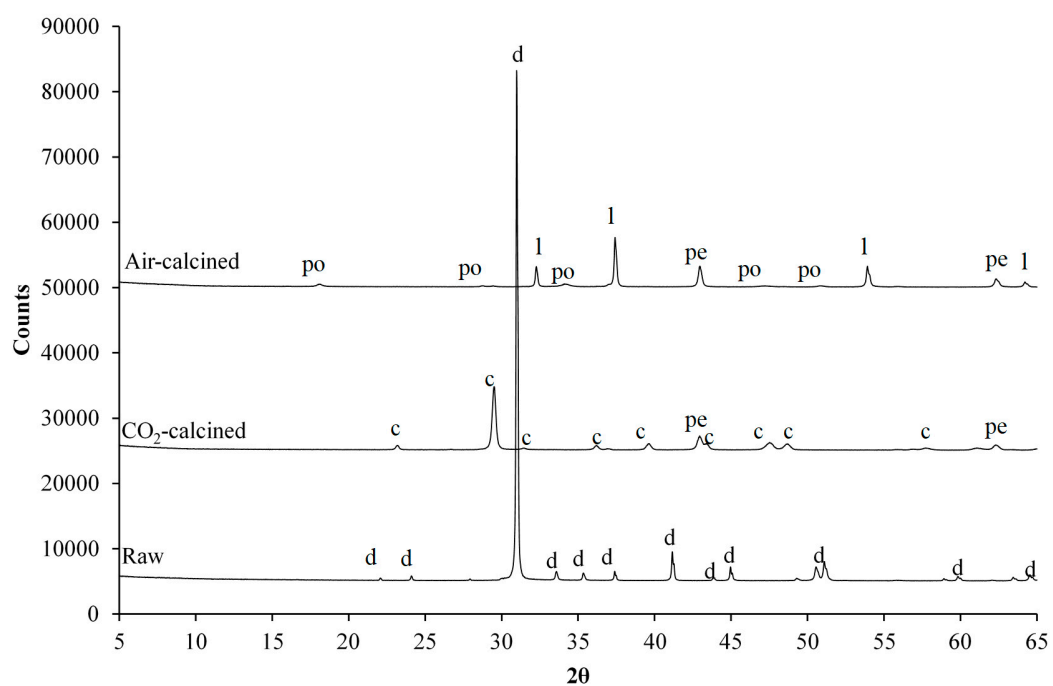

Figure S1: X-Ray Diffractograms of the products of the different dolomite thermal pretreatment processes. d = dolomite  $\text{MgCa}(\text{CO}_3)_2$ ; c = calcite  $\text{CaCO}_3$ ; pe = periclase;  $\text{MgO}$ ; l = lime  $\text{CaO}$ ; po = portlandite  $\text{Ca}(\text{OH})_2$

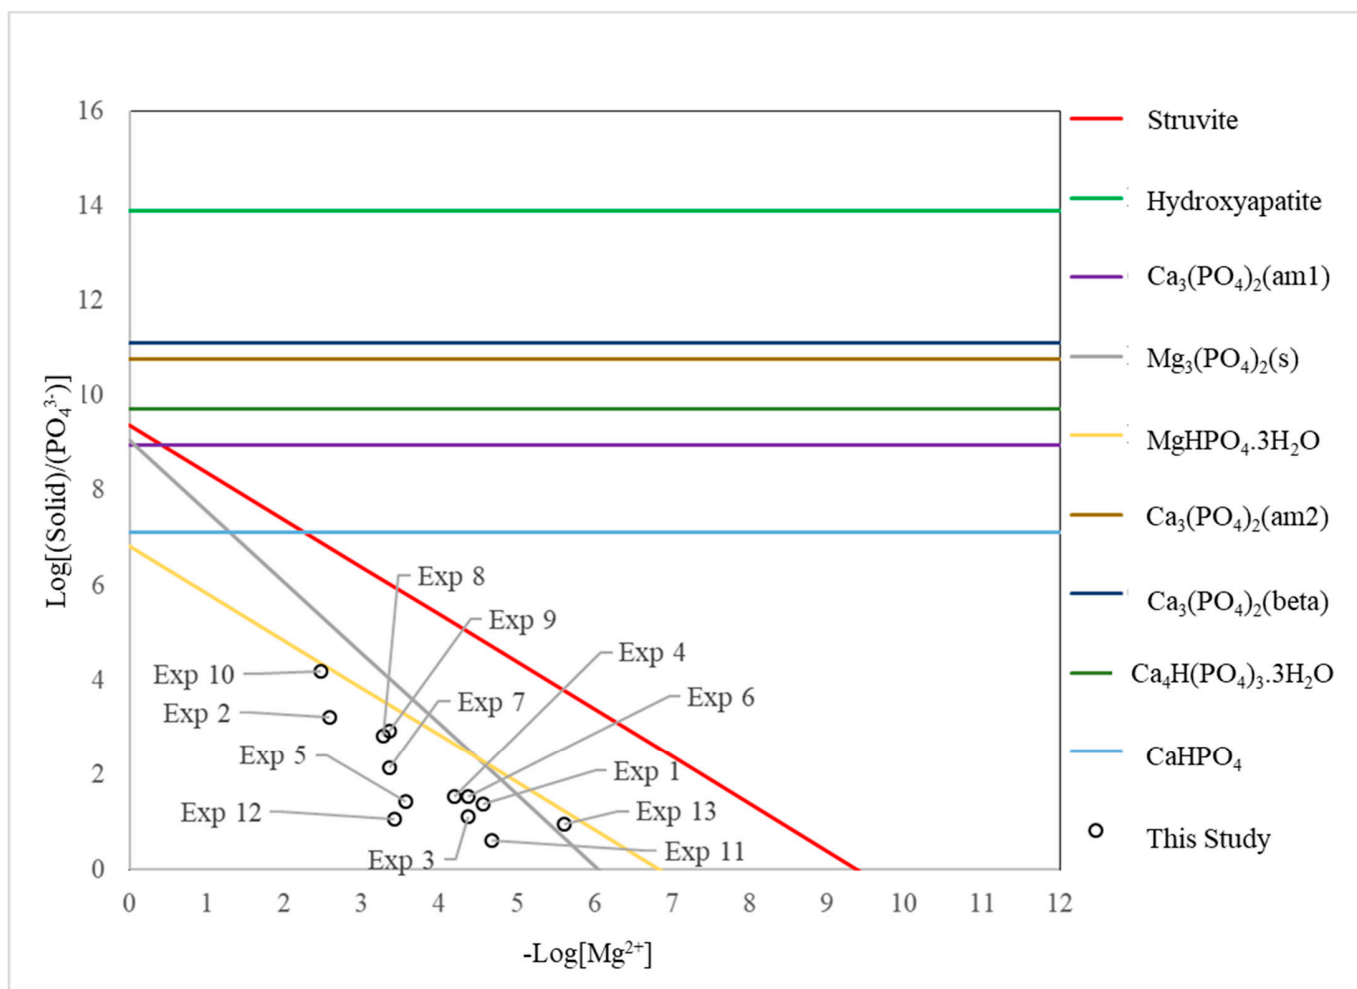

Figure S2. Activity ratio diagram for  $\text{PO}_4^{3-}$  solid phases vs  $\text{Mg}^{2+}$ .  $\text{pH} = 9.5$ ,  $\text{NH}_4^+ = 0.0527 \text{ M}$ ,  $\text{Ca}^{2+} = 0.2 \text{ M}$ .

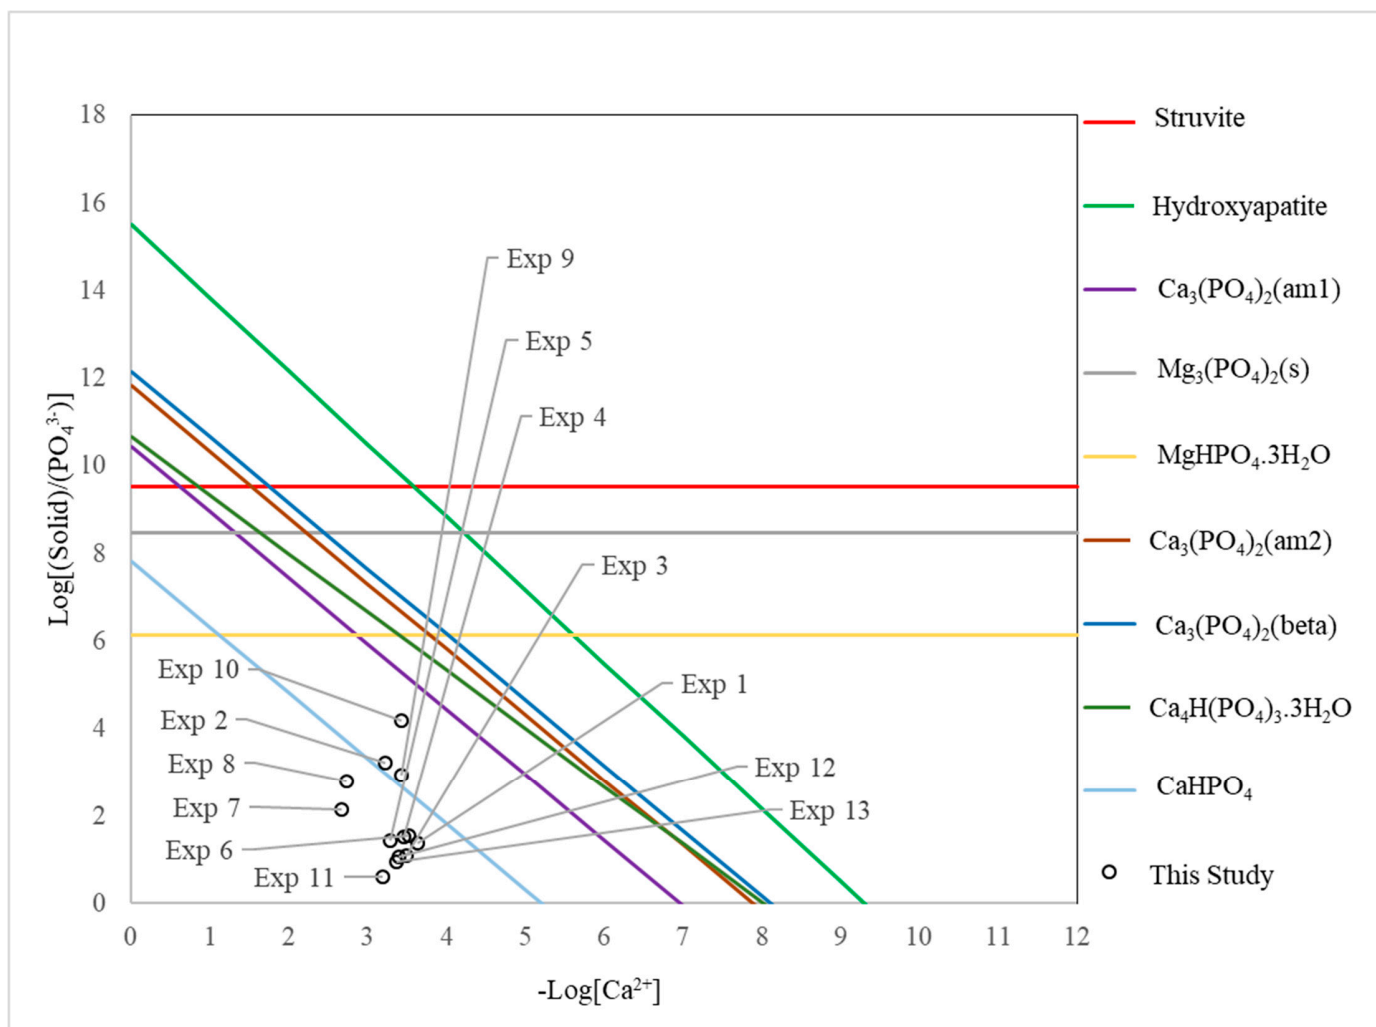

Figure S3. Activity ratio diagram for  $\text{PO}_4^{3-}$  solid phases vs  $\text{Ca}^{2+}$ .  $\text{pH} = 9.5$ ,  $\text{NH}_4^+ = 0.0527 \text{ M}$ ,  $\text{Mg}^{2+} = 0.2 \text{ M}$ .
